# Supplementary material for: Correlates of SARS-CoV-2 Variants on Deaths, Case Incidence and Case Fatality Ratio among the Continents for the Period of 1 December 2020 to 15 March 2021
Source: MDPI journal article supplement (doi:10.3390/genes12071061), 2021-07-12
Supplement: s1 [file s1]

**Supplementary Materials:**

Table S1: Clades frequencies of SARS-CoV-2 genome

| Continent     | SARS-CoV-2 clades frequencies |        |        |       |       |       |       |
|---------------|-------------------------------|--------|--------|-------|-------|-------|-------|
|               | G                             | GH     | GR     | GV    | L     | S     | V     |
| Africa        | 44.56%                        | 25.68% | 28.09% | 0.01% | 0%    | 1.6%  | 0.04% |
| Asia          | 52.25%                        | 7.75%  | 39.35% | 0.02% | 0%    | 0.61% | 0.03% |
| Australia     | 48.94%                        | 23.06% | 26.23% | 0.04% | 0.08% | 1.18% | 0.48% |
| Europe        | 57.24%                        | 4.59%  | 37.98% | 0.01% | 0.01% | 0.14% | 0.03% |
| North America | 59.42%                        | 31.24% | 9%     | 0.03% | 0%    | 0.29% | 0.03% |
| South America | 73.53%                        | 4.32%  | 14.96% | 4.48% | 0.08% | 0.77% | 1.87% |

Table S2: Correlation analysis between SARS-CoV-2 mutations and Case fatality rates, cases per million, and deaths per million among the identified mutations in all world continents.

| SARS-CoV-2 mutations | Case fatality ratio |       | Deaths/ 1M pop |       | Cases/ 1M pop |       | SARS-CoV-2 mutations | Case fatality ratio |       | Deaths/ 1M pop |       | Cases/ 1M pop |       |
|----------------------|---------------------|-------|----------------|-------|---------------|-------|----------------------|---------------------|-------|----------------|-------|---------------|-------|
|                      | r                   | p     | r              | p     | r             | p     |                      | r                   | p     | r              | p     | r             | p     |
| NSP2_T85I            | -0.029              | 0.957 | -0.486         | 0.329 | -0.543        | 0.266 | NSP2_M135T           | 0.698               | 0.123 | 0.030          | 0.954 | -0.213        | 0.686 |
| NSP2_G339S           | 0.771               | 0.072 | 0.771          | 0.072 | 0.600         | 0.208 | Spike_A1174V         | 0.696               | 0.125 | 0.087          | 0.870 | -0.174        | 0.742 |
| NSP5_A266V           | -0.257              | 0.623 | -0.543         | 0.266 | -0.429        | 0.397 | NSP2_V198I           | -0.429              | 0.397 | -0.714         | 0.111 | -0.600        | 0.208 |
| NSP12_P323L          | 0.086               | 0.872 | 0.886*         | 0.019 | 0.943**       | 0.005 | NSP6_M86I            | 0.314               | 0.544 | -0.371         | 0.468 | -0.543        | 0.266 |
| Spike_D614G          | 0.371               | 0.468 | 0.943**        | 0.005 | 0.886*        | 0.019 | NSP13_H164Y          | -0.771              | 0.072 | -0.086         | 0.872 | 0.086         | 0.872 |
| NS3_I35T             | 0.464               | 0.354 | -0.145         | 0.784 | -0.406        | 0.425 | NSP5_G71S            | 0.6                 | 0.208 | 0.486          | 0.329 | 0.429         | 0.397 |
| Spike_D1139Y         | 0.135               | 0.798 | 0.541          | 0.268 | 0.541         | 0.268 | NSP2_R380H           | 0.754               | 0.084 | 0.145          | 0.784 | -0.116        | 0.827 |
| N_G204R              | -0.086              | 0.872 | 0.371          | 0.468 | 0.429         | 0.397 | NSP2_I491T           | 0.000               | 1.000 | 0.696          | 0.125 | 0.696         | 0.125 |
| N_R203K              | -0.086              | 0.872 | 0.371          | 0.468 | 0.429         | 0.397 | NSP3_P1326S          | 0.754               | 0.084 | 0.145          | 0.784 | -0.116        | 0.827 |
| NS3_S171L            | 0.086               | 0.872 | -0.714         | 0.111 | -0.771        | 0.072 | NSP2_I296V           | 0.580               | 0.228 | 0.261          | 0.618 | 0.058         | 0.913 |
| NSP6_L37F            | -0.714              | 0.111 | -0.714         | 0.111 | -0.543        | 0.266 | NSP2_T634A           | 0.135               | 0.798 | 0.541          | 0.268 | 0.541         | 0.268 |
| N_S190I              | -0.371              | 0.468 | -0.600         | 0.208 | -0.543        | 0.266 | M_D3G                | -0.086              | 0.872 | 0.714          | 0.111 | 0.771         | 0.072 |
| NSP2_T153M           | 0.829*              | 0.042 | 0.257          | 0.623 | -0.029        | 0.957 | NSP3_P1558L          | 0.000               | 1.000 | 0.696          | 0.125 | 0.696         | 0.125 |
| NSP2_V198I           | -0.429              | 0.397 | -0.714         | 0.111 | -0.600        | 0.208 | NSP16_V78G           | -0.273              | 0.600 | 0.273          | 0.600 | 0.273         | 0.600 |
| NSP3_E475D           | -0.030              | 0.954 | 0.516          | 0.295 | 0.516         | 0.295 | Spike_Y28H           | -0.657              | 0.156 | -0.086         | 0.872 | 0.200         | 0.704 |
| NSP3_Q1884H          | -0.429              | 0.397 | -0.371         | 0.468 | -0.257        | 0.623 | NSP3_V1768G          | -0.439              | 0.383 | -0.034         | 0.949 | -0.034        | 0.949 |
| NSP3_T73I            | -0.886              | 0.019 | -0.314         | 0.544 | -0.029        | 0.957 | N_S202N              | 0.086               | 0.872 | -0.657         | 0.156 | -0.771        | 0.072 |
| Spike_A871S          | 0.522               | 0.288 | -0.087         | 0.870 | -0.348        | 0.499 | NS8_L84S             | -0.143              | 0.787 | -0.943**       | 0.005 | -1.000**      | 0.005 |
| NSP3_T1198K          | -0.600              | 0.208 | -0.886 *       | 0.019 | -0.771        | 0.072 | NSP3_T64P            | 0.393               | 0.441 | 0.655          | 0.158 | 0.655         | 0.158 |
| NSP12_G228C          | -0.152              | 0.774 | 0.395          | 0.439 | 0.395         | 0.439 | N_S194L              | -0.543              | 0.266 | -0.429         | 0.397 | -0.371        | 0.468 |
| Spike_A958S          | 0.030               | 0.954 | 0.577          | 0.231 | 0.577         | 0.231 | NSP12_A97V           | -0.657              | 0.156 | -0.943**       | 0.005 | -0.829*       | 0.042 |
| NSP2_S122            | 0.086               | 0.872 | 0.371          | 0.468 | 0.257         | 0.623 | NSP15_V22L           | 0.371               | 0.468 | 0.257          | 0.623 | 0.200         | 0.704 |
| NSP14_I42V           | 0.845*              | 0.034 | 0.068          | 0.899 | -0.169        | 0.749 | NS3_Q57H             | -0.143              | 0.787 | -0.600         | 0.208 | -0.657        | 0.156 |
| N_P344S              | 0.543               | 0.266 | 0.543          | 0.266 | 0.371         | 0.468 | N_S197L              | -0.600              | 0.208 | 0.029          | 0.957 | 0.257         | 0.623 |
| NSP1_M85I            | 0.030               | 0.954 | 0.577          | 0.231 | 0.577         | 0.231 | NS3_G251V            | -0.086              | 0.872 | -0.314         | 0.544 | -0.257        | 0.623 |
| NSP3_Q180H           | -0.829*             | 0.042 | -0.200         | 0.704 | 0.029         | 0.957 | NSP2_G212D           | -0.486              | 0.329 | 0.086          | 0.872 | 0.371         | 0.468 |
| Spike_L18F           | 0.829*              | 0.042 | 0.143          | 0.787 | -0.029        | 0.957 | NSP3_A58T            | -0.771              | 0.072 | -0.200         | 0.704 | 0.086         | 0.872 |
| Spike_E484K          | 0.257               | 0.623 | -0.486         | 0.329 | -0.600        | 0.208 | Spike_N439K          | -0.086              | 0.872 | -0.029         | 0.957 | 0.086         | 0.872 |
| Spike_H69del         | 0.086               | 0.872 | -0.143         | 0.787 | -0.086        | 0.872 | Spike_A222V          | 0.257               | 0.623 | 0.029          | 0.957 | 0.086         | 0.872 |
| Spike_K417N          | 0.200               | 0.704 | -0.600         | 0.208 | -0.657        | 0.156 | Spike_S477           | 0.143               | 0.787 | -0.429         | 0.397 | -0.371        | 0.468 |
| Spike_N501Y          | 0.543               | 0.266 | 0.086          | 0.872 | 0.029         | 0.957 | Spike_T20N           | -0.314              | 0.544 | 0.314          | 0.544 | 0.543         | 0.266 |

|               |        |       |        |       |        |       |             |         |       |        |       |        |       |
|---------------|--------|-------|--------|-------|--------|-------|-------------|---------|-------|--------|-------|--------|-------|
| Spike_G476S   | 0.270  | 0.604 | 0.676  | 0.140 | 0.676  | 0.140 | Spike_V483A | 0.091   | 0.864 | 0.638  | 0.173 | 0.638  | 0.173 |
| Spike_S477N   | 0.143  | 0.787 | -0.429 | 0.397 | -0.371 | 0.468 | Spike_E484Q | 0.464   | 0.354 | -0.145 | 0.787 | -0.406 | 0.425 |
| Spike_T478I   | 0.290  | 0.577 | -0.029 | 0.957 | -0.232 | 0.658 | Spike_Y453F | 0.577   | 0.231 | 0.516  | 0.295 | 0.395  | 0.439 |
| Spike_V1176F  | -0.600 | 0.208 | 0.029  | 0.957 | 0.257  | 0.623 | N_P13L      | -0.714  | 0.111 | -0.429 | 0.397 | -0.200 | 0.704 |
| Spike_E780Q   | -0.429 | 0.397 | -0.371 | 0.468 | -0.257 | 0.623 | NS3_V13L    | -0.029  | 0.957 | -0.314 | 0.544 | -0.200 | 0.704 |
| Spike_Y145del | -0.257 | 0.623 | 0.086  | 0.872 | 0.257  | 0.623 | NS8_Q27stop | 0.086   | 0.872 | -0.143 | 0.787 | -0.086 | 0.872 |
| N_I292T       | 0.429  | 0.397 | 0.029  | 0.957 | -0.086 | 0.872 | NSP2_I559V  | -0.143  | 0.787 | -0.429 | 0.397 | -0.314 | 0.544 |
| NS8_S24L      | -0.714 | 0.111 | -0.086 | 0.872 | 0.143  | 0.787 | NSP5_G15S   | 0.429   | 0.397 | -0.029 | 0.957 | -0.086 | 0.872 |
| NSP2_D268del  | -0.600 | 0.208 | -0.314 | 0.544 | -0.086 | 0.872 | NSP13_Y541C | -0.829* | 0.042 | -0.257 | 0.623 | 0.029  | 0.957 |
| NSP2_P585S    | 0.086  | 0.872 | -0.486 | 0.329 | -0.429 | 0.397 | NSP13_P504L | -0.429  | 0.397 | -0.143 | 0.787 | 0.086  | 0.872 |

\*. Correlation is significant at the 0.05 level (2-tailed). \*\*. Correlation is significant at the 0.01 level (2-tailed). r: Spearman's correlation. P: P-value.

Table S3: Dendrogram showing clustering of SARS-CoV-2 isolates and heatmap of the frequency of mutations of the SARS-CoV-2 genome by continent.

| Dendrogram                                                                        | Region        | Virus isolates | NSP2_T85I | NSP2_G395S | NSP5_A2466V | NSP12_P323L | Spike_D614G | NS3_I35T | Spike_D1139Y | N_G204R | N_R203K | NS3_S171L | NSP6_L37F | N_S190I | NSP2_T153M | NSP2_V158I | NSP3_E475D | NSP3_Q1884H | NSP3_T73I | Spike_A871S | NSP3_T1198K | NSP12_G328C | Spike_A058S | NSP2_S122 | NSP14_I42V | N_P344S | NSP1_M85I | NSP2_M135T | Spike_A1174V | NSP2_V158I | NSP6_M86I | NSP3_H164Y | NSP5_G71S | NSP2_R380H | NSP2_I491T | NSP3_P1326S | NSP2_I296V | NSP2_T634A | M_D3G | NSP3_P1558L | NSP16_V78G | Spike_Y28H | NSP3_V1768G |      |
|-----------------------------------------------------------------------------------|---------------|----------------|-----------|------------|-------------|-------------|-------------|----------|--------------|---------|---------|-----------|-----------|---------|------------|------------|------------|-------------|-----------|-------------|-------------|-------------|-------------|-----------|------------|---------|-----------|------------|--------------|------------|-----------|------------|-----------|------------|------------|-------------|------------|------------|-------|-------------|------------|------------|-------------|------|
|  | Asia          | 34,736         | 6.85      | 0.32       | 0.003       | 95.52       | 96.46       | 0.04     | 0.000        | 75.69   | 75.88   | 1.50      | 6.61      | 0.03    | 0.02       | 0.22       | 0.003      | 2.41        | 0.05      | 0.02        | 0.41        | 0.032       | 0.003       | 0.10      | 0.000      | 0.02    | 0.01      | 0.000      | 0.02         | 0.22       | 0.83      | 0.13       | 0.07      | 0.00       | 0.009      | 0.01        | 0.00       | 0.000      | 0.07  | 0.066       | 0.026      | 0.01       | 0.02        |      |
|                                                                                   | South America | 6,702          | 7.92      | 1.42       | 0.015       | 96.43       | 97.02       | 0.00     | 0.000        | 76.01   | 76.41   | 1.19      | 3.01      | 0.01    | 0.07       | 0.01       | 0.000      | 0.06        | 0.03      | 0.00        | 0.07        | 0.000       | 0.000       | 0.06      | 0.000      | 0.06    | 0.00      | 0.000      | 0.00         | 0.01       | 0.01      | 0.10       | 0.82      | 0.01       | 0.015      | 0.00        | 0.01       | 0.000      | 0.30  | 0.134       | 0.000      | 0.01       | 0.00        |      |
|                                                                                   | Australia     | 1,670          | 24.97     | 0.12       | 0.838       | 91.08       | 91.02       | 0.00     | 0.000        | 46.59   | 47.90   | 3.29      | 7.37      | 0.12    | 0.00       | 0.66       | 0.000      | 0.24        | 0.18      | 0.00        | 1.56        | 0.000       | 0.000       | 0.00      | 0.000      | 0.00    | 0.00      | 0.000      | 0.00         | 0.66       | 0.18      | 0.12       | 0.18      | 0.00       | 0.000      | 0.00        | 0.00       | 0.000      | 0.06  | 0.000       | 0.000      | 0.06       | 0.00        |      |
|                                                                                   | Europe        | 346,951        | 1.34      | 0.60       | 0.012       | 98.35       | 98.99       | 0.03     | 0.005        | 52.36   | 53.51   | 1.20      | 2.64      | 0.02    | 0.04       | 0.02       | 0.014      | 0.12        | 0.05      | 0.02        | 0.01        | 0.007       | 0.006       | 0.07      | 0.003      | 0.03    | 0.01      | 0.001      | 0.04         | 0.02       | 0.31      | 0.10       | 0.56      | 0.01       | 0.005      | 0.03        | 0.01       | 0.000      | 0.25  | 0.009       | 0.001      | 0.01       | 0.00        |      |
|                                                                                   | Africa        | 5,768          | 40.20     | 0.40       | 0.035       | 88.66       | 91.97       | 0.14     | 0.000        | 22.31   | 24.24   | 30.37     | 2.98      | 0.07    | 1.18       | 0.10       | 0.000      | 0.09        | 0.02      | 0.05        | 0.21        | 0.000       | 0.000       | 0.00      | 0.07       | 0.017   | 0.03      | 0.00       | 0.017        | 0.09       | 0.10      | 5.27       | 0.07      | 0.36       | 0.05       | 0.000       | 0.03       | 0.02       | 0.000 | 0.00        | 0.000      | 0.000      | 0.00        | 0.00 |
|                                                                                   | North America | 157,691        | 59.59     | 0.33       | 0.068       | 94.79       | 97.91       | 0.07     | 0.005        | 14.82   | 15.08   | 0.72      | 2.88      | 1.36    | 0.07       | 0.01       | 0.031      | 0.04        | 0.10      | 0.01        | 0.02        | 0.003       | 0.003       | 0.13      | 0.000      | 0.04    | 0.01      | 0.001      | 0.02         | 0.01       | 0.08      | 0.13       | 0.08      | 0.03       | 0.002      | 0.02        | 0.08       | 0.001      | 0.63  | 0.001       | 0.015      | 0.05       | 0.01        |      |

| Dendrogram                                                                          |               | Region  | Virus Isolates | N_5202N | NSB_L84S | NSP3_T64P | N_5194L | NSP12_A97V | NSP15_V22L | NS3_Q57H | N_5197L | NS3_G25IV | NSP2_G212D | NSP3_A58T | NSP3_Q180H | Spike_L18F | Spike_E484K | Spike_H694del | Spike_K417N | Spike_N439K | Spike_N501Y | Spike_A222V | Spike_G476S | Spike_S477 | Spike_S477N | Spike_T20N | Spike_T478I | Spike_V483A | Spike_V1176F | Spike_E484Q | Spike_E780Q | Spike_M53F | Spike_Y145del | N_P13L | N_I292T | NS3_V13L | NSB_S24L | NSB_Q275stop | NSP2_D768del | NSP2_I559V | NSP2_P585S | NSP5_G15S | NSP13_P504L | NSP13_T541C |
|-------------------------------------------------------------------------------------|---------------|---------|----------------|---------|----------|-----------|---------|------------|------------|----------|---------|-----------|------------|-----------|------------|------------|-------------|---------------|-------------|-------------|-------------|-------------|-------------|------------|-------------|------------|-------------|-------------|--------------|-------------|-------------|------------|---------------|--------|---------|----------|----------|--------------|--------------|------------|------------|-----------|-------------|-------------|
|  | Asia          | 34,736  | 1.01           | 1.39    | 0.000    | 7.94      | 0.52    | 0.02       | 15.21      | 0.04     | 0.11    | 0.01      | 0.09       | 0.15      | 0.72       | 0.90       | 3.69        | 0.22          | 0.61        | 4.07        | 0.78        | 0.00        | 0.33        | 0.29       | 0.03        | 0.27       | 0.003       | 0.47        | 0.02         | 0.01        | 0.00        | 0.04       | 0.63          | 0.02   | 0.10    | 0.45     | 3.56     | 0.02         | 0.01         | 0.01       | 0.21       | 0.03      | 0.01        |             |
|                                                                                     | South America | 6,702   | 0.03           | 0.25    | 0.000    | 1.46      | 0.09    | 0.04       | 14.71      | 4.12     | 1.24    | 0.04      | 0.03       | 0.10      | 5.94       | 15.58      | 2.54        | 0.04          | 0.07        | 8.27        | 1.06        | 0.00        | 1.85        | 1.78       | 5.36        | 0.00       | 0.000       | 29.30       | 0.00         | 0.15        | 0.00        | 0.03       | 1.49          | 20.50  | 0.37    | 0.88     | 2.78     | 0.01         | 0.06         | 0.03       | 8.95       | 0.19      | 0.04        |             |
|                                                                                     | Australia     | 1,670   | 0.48           | 3.29    | 0.000    | 6.71      | 1.98    | 0.06       | 32.99      | 1.80     | 1.08    | 0.36      | 0.36       | 0.18      | 1.86       | 3.11       | 12.69       | 2.34          | 1.86        | 14.31       | 2.75        | 0.00        | 16.23       | 16.23      | 0.12        | 0.00       | 0.000       | 0.90        | 0.00         | 0.18        | 0.00        | 0.06       | 3.29          | 0.06   | 0.48    | 4.73     | 13.35    | 0.18         | 0.54         | 0.60       | 1.56       | 0.84      | 0.84        |             |
|                                                                                     | Europe        | 346,951 | 0.22           | 0.25    | 0.001    | 2.14      | 0.05    | 0.14       | 7.73       | 0.04     | 0.10    | 0.05      | 0.04       | 0.08      | 10.90      | 0.85       | 48.93       | 0.56          | 3.97        | 47.23       | 26.59       | 0.02        | 5.38        | 5.18       | 0.08        | 0.01       | 0.005       | 0.26        | 0.02         | 0.01        | 0.29        | 0.21       | 0.10          | 0.04   | 0.21    | 0.38     | 46.36    | 0.02         | 0.03         | 0.03       | 0.53       | 0.06      | 0.01        |             |
|                                                                                     | Africa        | 5,768   | 4.09           | 4.09    | 0.000    | 3.66      | 0.28    | 0.10       | 46.10      | 0.02     | 0.16    | 0.00      | 0.00       | 0.05      | 16.02      | 35.63      | 4.20        | 34.36         | 0.10        | 36.55       | 1.37        | 0.00        | 5.39        | 5.36       | 0.00        | 0.03       | 0.000       | 0.10        | 0.03         | 0.09        | 0.02        | 0.03       | 0.42          | 0.54   | 0.24    | 0.17     | 3.81     | 0.02         | 0.03         | 0.03       | 2.98       | 0.03      | 0.00        |             |
|                                                                                     | North America | 157,691 | 0.11           | 0.51    | 0.000    | 14.28     | 0.23    | 0.34       | 63.30      | 0.23     | 0.06    | 0.01      | 0.01       | 1.18      | 1.25       | 1.79       | 3.48        | 0.07          | 0.06        | 3.57        | 0.50        | 0.01        | 0.94        | 0.83       | 0.03        | 0.01       | 0.004       | 0.53        | 0.03         | 0.80        | 0.02        | 0.05       | 0.96          | 0.13   | 0.17    | 33.88    | 3.31     | 0.06         | 0.03         | 0.03       | 0.29       | 0.39      | 0.15        |             |
